# Supplementary material for: An Au5Ag12(SR)9(dppf)4 alloy nanocluster: structural determination and optical property and photothermal conversion investigation
Source: Royal Society of Chemistry journal article supplement (doi:10.1039/d4nr00312h), 2024-01-01
Supplement: d4nr00312h1.pdf [file d4nr00312h1.pdf]

## Supporting Information

### **Au<sub>5</sub>Ag<sub>12</sub>(SR)<sub>9</sub>(dppf)<sub>4</sub> alloy nanocluster: Structural determination, optical property and photothermal effect investigation**

Jiawei Wang,<sup>a</sup> Along Ma,<sup>a,b</sup> Yonggang Ren,<sup>a</sup> Xuekairui Shen,<sup>a</sup> Yifei Wang,<sup>a</sup> Caixia Song <sup>\*a</sup> and Shuxin Wang <sup>\*a,b</sup>

<sup>a</sup>College of Materials Science and Engineering, Qingdao University of Science and Technology, Qingdao 266042, P. R. China.

<sup>b</sup>Shandong Key Laboratory of Biochemical Analysis, College of Chemistry and Molecular Engineering, Qingdao University of Science and Technology, Qingdao 266042, P. R. China.

\*Corresponding author, e-mail: [songcaixia@qust.edu.cn](mailto:songcaixia@qust.edu.cn) (Caixia Song); [shuxin\\_wang@qust.edu.cn](mailto:shuxin_wang@qust.edu.cn) (Shuxin Wang)

### Table of Contents

#### Section 1. Supporting Figures

**Figure S1.** The optical microscopic image of the single crystals of the **Au<sub>5</sub>Ag<sub>12</sub>**, **Au<sub>5</sub>Ag<sub>11</sub>**, **Au<sub>4</sub>Ag<sub>13</sub>** and **Au<sub>7</sub>Ag<sub>8</sub>** nanoclusters.

**Figure S2.** The UV-vis absorbance spectra of the **Au<sub>5</sub>Ag<sub>11</sub>**, **Au<sub>4</sub>Ag<sub>13</sub>** and **Au<sub>7</sub>Ag<sub>8</sub>** nanoclusters in CH<sub>2</sub>Cl<sub>2</sub>.

**Figure S3.** The overall structure of the **Au<sub>5</sub>Ag<sub>12</sub>**, **Au<sub>5</sub>Ag<sub>11</sub>**, **Au<sub>4</sub>Ag<sub>13</sub>** and **Au<sub>7</sub>Ag<sub>8</sub>** nanoclusters.

**Figure S4.** UV-vis absorption spectrum (photon energy scale) of the **Au<sub>5</sub>Ag<sub>12</sub>** nanocluster in CH<sub>2</sub>Cl<sub>2</sub>.

**Figure S5.** XPS spectra of the **Au<sub>5</sub>Ag<sub>12</sub>** nanocluster.

**Figure S6.** SEM image and corresponding elemental mapping images of **Au<sub>5</sub>Ag<sub>12</sub>** nanocluster.

**Figure S7.** Monitoring the stability of **Au<sub>5</sub>Ag<sub>12</sub>** nanocluster.

**Figure S8.** The unit cell the **Au<sub>5</sub>Ag<sub>12</sub>**, **Au<sub>5</sub>Ag<sub>11</sub>**, **Au<sub>4</sub>Ag<sub>13</sub>** and **Au<sub>7</sub>Ag<sub>8</sub>** nanoclusters.

**Figure S9.** Packing mode of the **Au<sub>5</sub>Ag<sub>12</sub>** in the crystal.

**Figure S10.** Packing mode of the **Au<sub>5</sub>Ag<sub>11</sub>** in the crystal.

**Figure S11.** Packing mode of the **Au<sub>7</sub>Ag<sub>8</sub>** in the crystal.

**Figure S12.** Packing mode of the **Au<sub>4</sub>Ag<sub>13</sub>** in the crystal.

**Figure S13.** UV-vis absorption spectra (photon energy scale) of the **Au<sub>5</sub>Ag<sub>12</sub>**, **Au<sub>5</sub>Ag<sub>11</sub>**, **Au<sub>4</sub>Ag<sub>13</sub>** and **Au<sub>7</sub>Ag<sub>8</sub>** nanoclusters in CH<sub>2</sub>Cl<sub>2</sub>.

**Figure S14.** Photoluminescence spectra of **Au<sub>5</sub>Ag<sub>12</sub>** nanocluster in the CH<sub>2</sub>Cl<sub>2</sub> solution.

**Figure S15.** Photoluminescence spectra of **Au<sub>5</sub>Ag<sub>12</sub>** nanocluster in the solid state.

**Figure S16.** Temperature-dependent PL and UV-vis absorption spectra of **Au<sub>5</sub>Ag<sub>12</sub>**, **Au<sub>5</sub>Ag<sub>11</sub>**,

**Au<sub>4</sub>Ag<sub>13</sub>** and **Au<sub>7</sub>Ag<sub>8</sub>** nanoclusters.

**Figure S17.** Temperature-dependent PL spectra of **Au<sub>5</sub>Ag<sub>12</sub>** nanocluster from 1100 nm to 2500 nm in 2-MeTHF from 300 K to 80 K.

**Figure S18.** Simplified Jablonski diagram illustrating photophysical processes of **Au<sub>5</sub>Ag<sub>12</sub>** nanocluster.

**Figure S19.** Time dependent images of **Au<sub>5</sub>Ag<sub>12</sub>** solutions of different concentrations (0.1 mM, 0.05 mM, and 0.01 mM) upon laser irradiation, followed by a cooling period.

**Figure S20.** The photothermal stability of **Au<sub>5</sub>Ag<sub>12</sub>** nanoclusters at different concentrations was monitored by UV-vis spectroscopy.

**Figure S21.** Temperature change of blank CHCl<sub>3</sub> solvent.

**Figure S22.** Absorption spectra of **Au<sub>5</sub>Ag<sub>12</sub>**, **Au<sub>5</sub>Ag<sub>11</sub>**, **Au<sub>7</sub>Ag<sub>8</sub>** nanoclusters.

**Figure S23.** Fluorescence decay profile of **Au<sub>4</sub>Ag<sub>13</sub>**, **Au<sub>7</sub>Ag<sub>8</sub>** and **Au<sub>5</sub>Ag<sub>11</sub>** nanoclusters.

**Figure S24.** The time-dependent temperature of the four AuAg alloy nanoclusters solutions (0.1 mM) during laser irradiation at 808 nm with different power.

**Figure S25.** The time-dependent temperature of the four AuAg alloy nanoclusters solutions (0.1 mM) during laser irradiation at 1.4 W cm<sup>-2</sup> with different wavelengths.

**Figure S26.** Photothermal cycling measurement and corresponding UV-vis spectra of **Au<sub>5</sub>Ag<sub>12</sub>** solutions (0.1 mM, 0.05 mM, 0.01 mM).

**Figure S27.** Photothermal cycling measurement and corresponding UV-vis spectra of **Au<sub>5</sub>Ag<sub>11</sub>**, **Au<sub>4</sub>Ag<sub>13</sub>** and **Au<sub>7</sub>Ag<sub>8</sub>** nanoclusters in CHCl<sub>3</sub>.

**Figure S28.** Monitoring the stability of **Au<sub>5</sub>Ag<sub>12</sub>**, **Au<sub>5</sub>Ag<sub>11</sub>**, **Au<sub>4</sub>Ag<sub>13</sub>** and **Au<sub>7</sub>Ag<sub>8</sub>** nanoclusters in CHCl<sub>3</sub> within 14 days.

## Section 2. Supporting Table

**Table S1.** The crystal structure parameters for **Au<sub>5</sub>Ag<sub>12</sub>(SR)<sub>9</sub>(dppf)<sub>4</sub>**.

**Table S2.** The corresponding PLQY,  $\tau$ ,  $k_R$  and  $k_{NR}$  of **Au<sub>4</sub>Ag<sub>13</sub>**, **Au<sub>7</sub>Ag<sub>8</sub>**, and **Au<sub>5</sub>Ag<sub>11</sub>** nanoclusters.

## Section 1. Supporting Figures

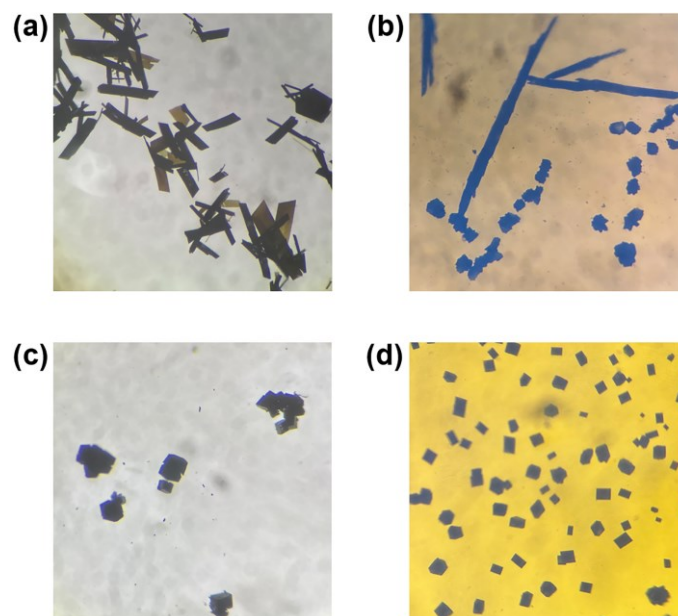

**Figure S1.** The optical microscopic image of the single crystals of the Au<sub>5</sub>Ag<sub>12</sub>, Au<sub>5</sub>Ag<sub>11</sub>, Au<sub>4</sub>Ag<sub>13</sub> and Au<sub>7</sub>Ag<sub>8</sub> nanoclusters. (a) Au<sub>5</sub>Ag<sub>12</sub>; (b) Au<sub>5</sub>Ag<sub>11</sub>; (c) Au<sub>4</sub>Ag<sub>13</sub>; (d) Au<sub>7</sub>Ag<sub>8</sub>.

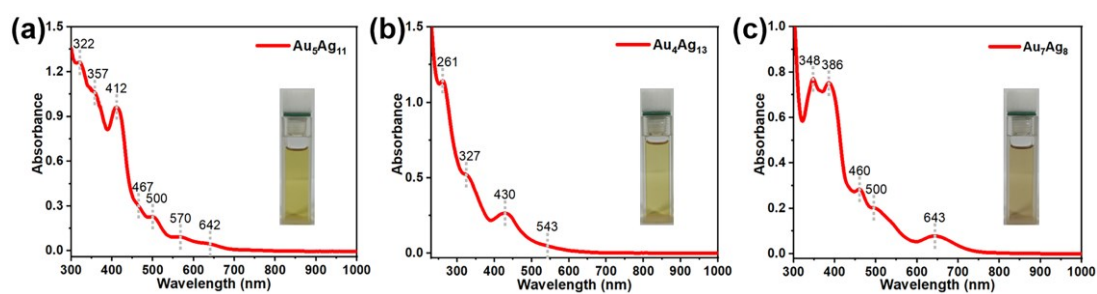

**Figure S2.** The UV-vis absorbance spectra of the Au<sub>5</sub>Ag<sub>11</sub>, Au<sub>4</sub>Ag<sub>13</sub> and Au<sub>7</sub>Ag<sub>8</sub> nanoclusters in CH<sub>2</sub>Cl<sub>2</sub> (Insets are the photos of three nanoclusters in CH<sub>2</sub>Cl<sub>2</sub>). (a) Au<sub>5</sub>Ag<sub>11</sub>; (b) Au<sub>4</sub>Ag<sub>13</sub>; (c) Au<sub>7</sub>Ag<sub>8</sub>.

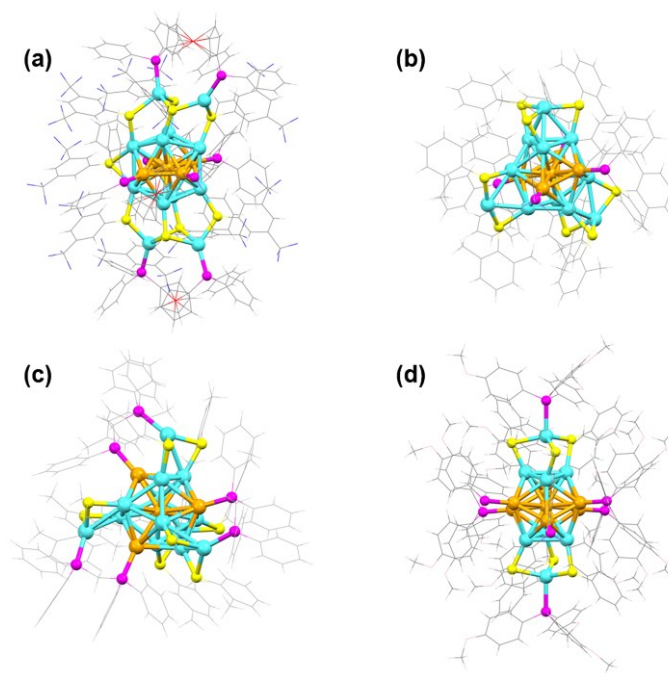

**Figure S3.** The overall structure of the  $\text{Au}_5\text{Ag}_{12}$ ,  $\text{Au}_5\text{Ag}_{11}$ ,  $\text{Au}_4\text{Ag}_{13}$  and  $\text{Au}_7\text{Ag}_8$  nanoclusters. (a)  $\text{Au}_5\text{Ag}_{12}$ ; (b)  $\text{Au}_5\text{Ag}_{11}$ ; (c)  $\text{Au}_4\text{Ag}_{13}$ ; (d)  $\text{Au}_7\text{Ag}_8$ . Color labels: orange = Au; light blue = Ag; red = Fe; yellow = S; magenta = P; pink = O; grey = C; white = H.

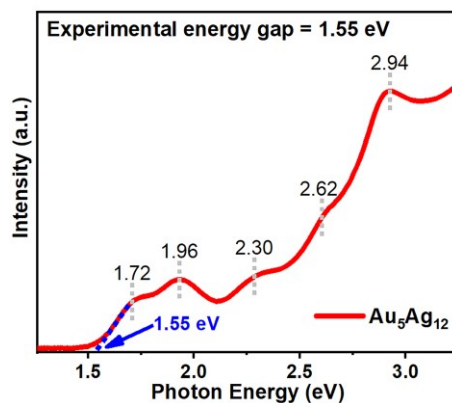

**Figure S4.** UV-vis absorption spectrum (photon energy scale) of the  $\text{Au}_5\text{Ag}_{12}$  nanocluster in  $\text{CH}_2\text{Cl}_2$ . The experimental energy gap of the  $\text{Au}_5\text{Ag}_{12}$  nanocluster in  $\text{CH}_2\text{Cl}_2$  was determined as  $\sim 1.55$  eV.

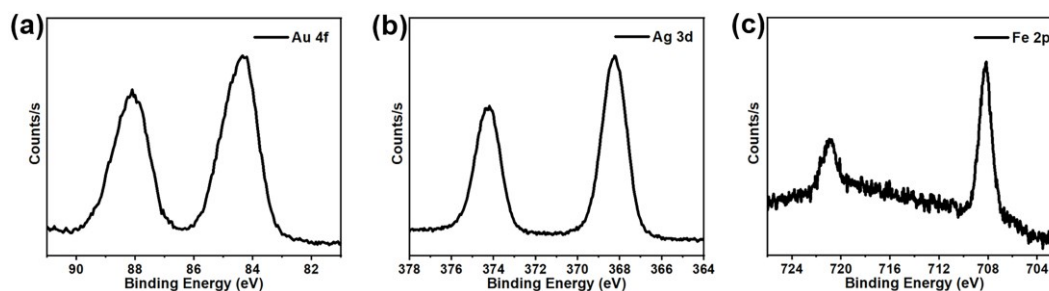

**Figure S5.** XPS spectra of the  $\text{Au}_5\text{Ag}_{12}$  nanocluster. (a) Au 4f; (b) Ag 3d; (c) Fe 2p.

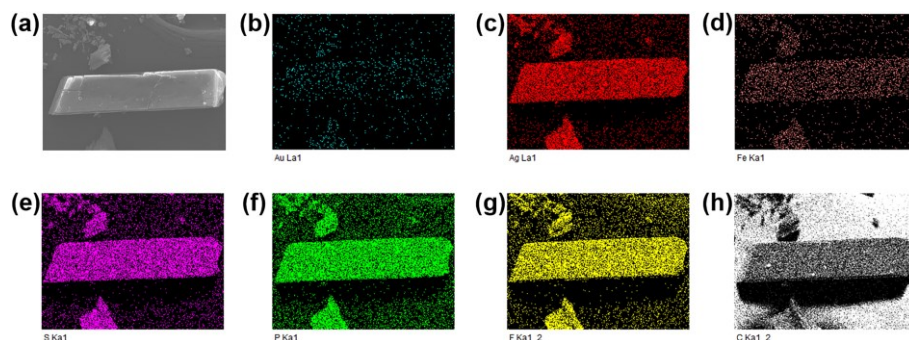

**Figure S6.** SEM image and corresponding elemental mapping images of  $\text{Au}_5\text{Ag}_{12}$  nanocluster. (a) SEM image of a small deformed single crystal; (b)-(h) Elemental mapping images of Au, Ag, Fe, S, P, F, and C, respectively.

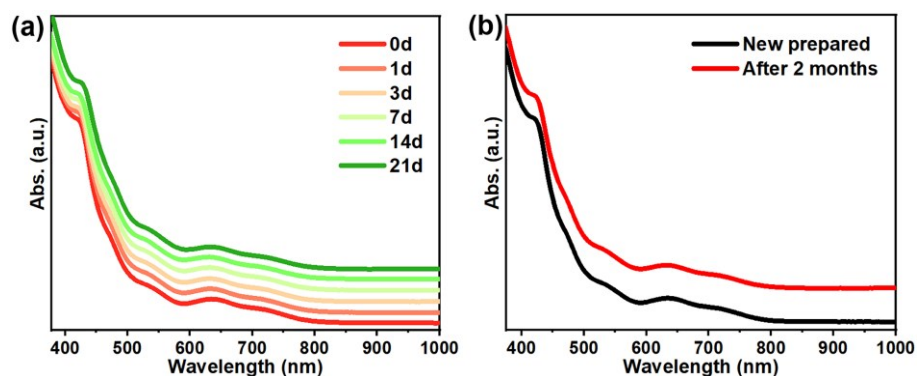

**Figure S7.** Monitoring the stability of  $\text{Au}_5\text{Ag}_{12}$  nanocluster. (a) Time-dependent UV-vis spectra of  $\text{Au}_5\text{Ag}_{12}$  in the  $\text{CH}_2\text{Cl}_2$  solution; (b) Time-dependent UV-vis spectra of  $\text{Au}_5\text{Ag}_{12}$  in the solid state.

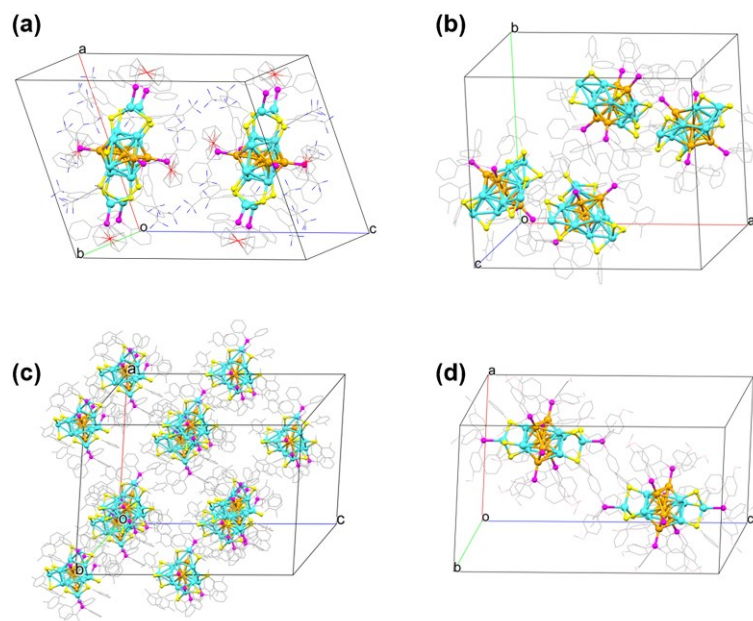

**Figure S8.** The unit cell the  $\text{Au}_5\text{Ag}_{12}$ ,  $\text{Au}_5\text{Ag}_{11}$ ,  $\text{Au}_4\text{Ag}_{13}$  and  $\text{Au}_7\text{Ag}_8$  nanoclusters. (a)  $\text{Au}_5\text{Ag}_{12}$ ; (b)  $\text{Au}_5\text{Ag}_{11}$ ; (c)  $\text{Au}_4\text{Ag}_{13}$ ; (d)  $\text{Au}_7\text{Ag}_8$ . Color labels: orange = Au; light blue = Ag; red = Fe; yellow = S; magenta = P; pink = O; grey = C; white = H. All H atoms are omitted for clarity.

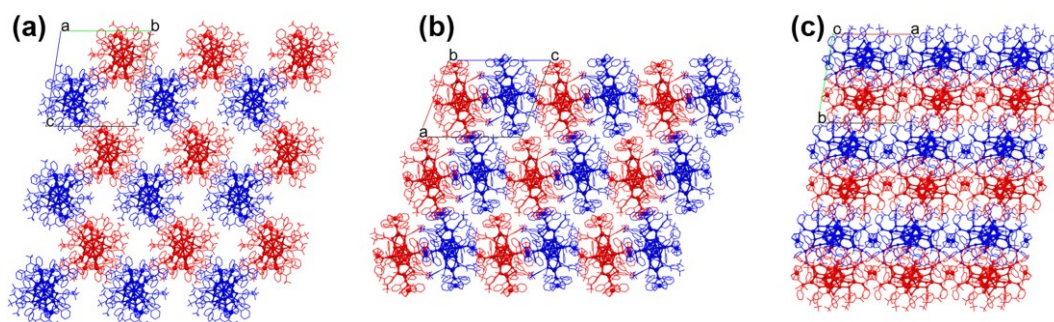

**Figure S9.** Packing mode of the  $\text{Au}_5\text{Ag}_{12}$  in the crystal shown. (a) Along the a axis; (b) Along the b axis; (c) Along the c axis. All H atoms are omitted for clarity. The cluster molecules arranged in different directions show in different colors.

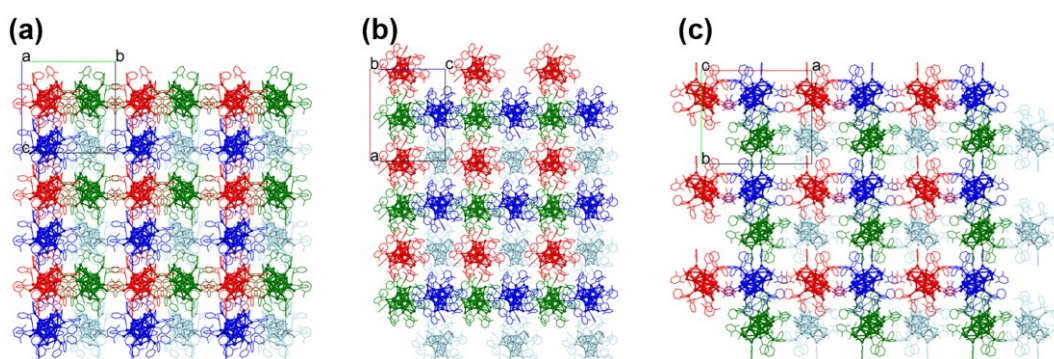

**Figure S10.** Packing mode of the  $\text{Au}_5\text{Ag}_{11}$  in the crystal shown. (a) Along the a axis; (b) Along the b axis; (c) Along the c axis. All H atoms are omitted for clarity. The cluster molecules arranged in different directions show in different colors.

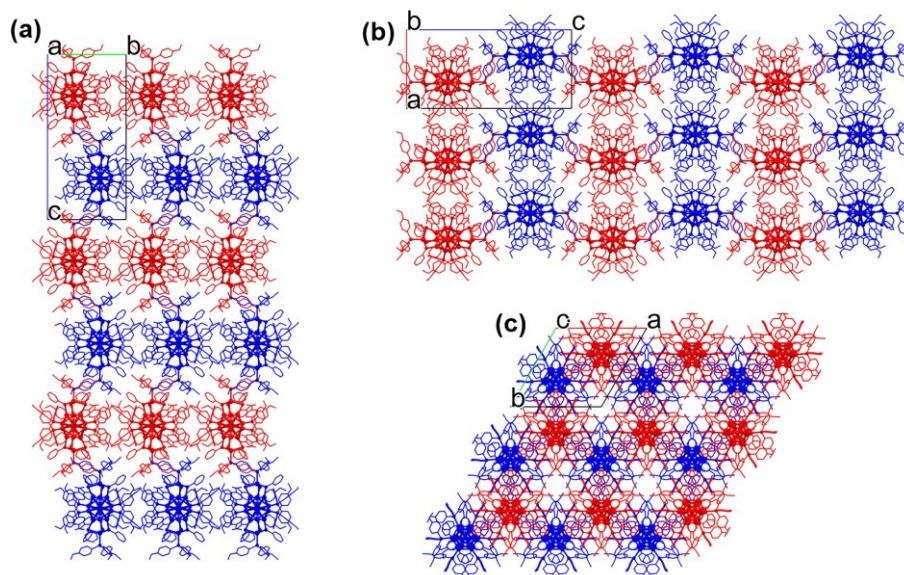

**Figure S11.** Packing mode of the  $\text{Au}_7\text{Ag}_8$  in the crystal shown. (a) Along the a axis; (b) Along the b axis; (c) Along the c axis. All H atoms are omitted for clarity. The cluster molecules arranged in different directions show in different colors.

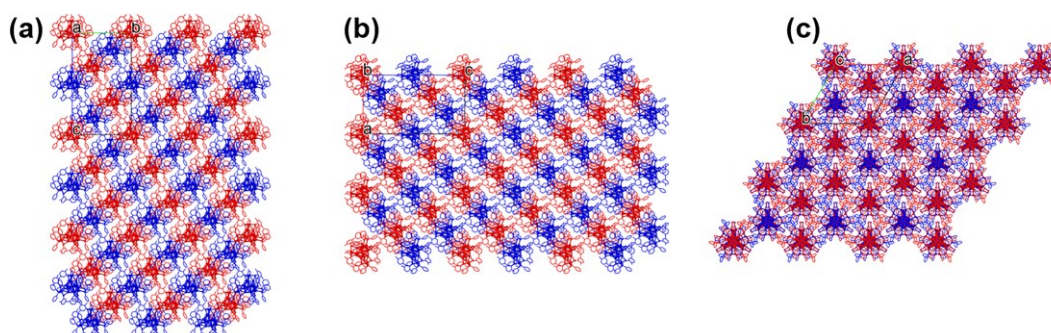

**Figure S12.** Packing mode of the  $\text{Au}_4\text{Ag}_{13}$  in the crystal shown. (a) Along the a axis; (b) Along the b axis; (c) Along the c axis. All H atoms are omitted for clarity. The cluster molecules arranged in different directions show in different colors.

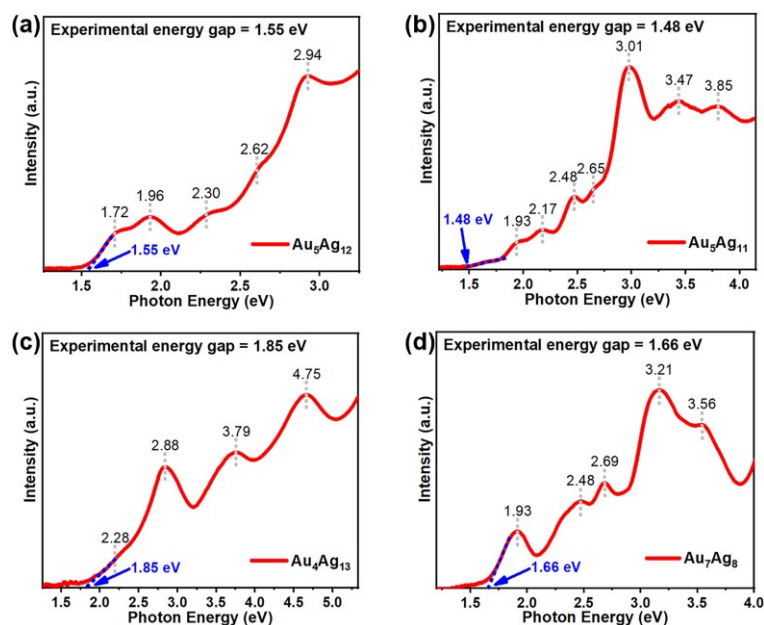

**Figure S13.** UV-vis absorption spectra (photon energy scale) of the  $\text{Au}_5\text{Ag}_{12}$ ,  $\text{Au}_5\text{Ag}_{11}$ ,  $\text{Au}_4\text{Ag}_{13}$  and  $\text{Au}_7\text{Ag}_8$  nanoclusters in  $\text{CH}_2\text{Cl}_2$ . (a)  $\text{Au}_5\text{Ag}_{12}$ ; (b)  $\text{Au}_5\text{Ag}_{11}$ ; (c)  $\text{Au}_4\text{Ag}_{13}$ ; (d)  $\text{Au}_7\text{Ag}_8$ . The experimental energy gap of the  $\text{Au}_5\text{Ag}_{12}$ ,  $\text{Au}_5\text{Ag}_{11}$ ,  $\text{Au}_4\text{Ag}_{13}$  and  $\text{Au}_7\text{Ag}_8$  nanoclusters in  $\text{CH}_2\text{Cl}_2$  was determined as  $\sim 1.55$  eV, 1.48 eV, 1.85 eV, and 1.66 eV, respectively.

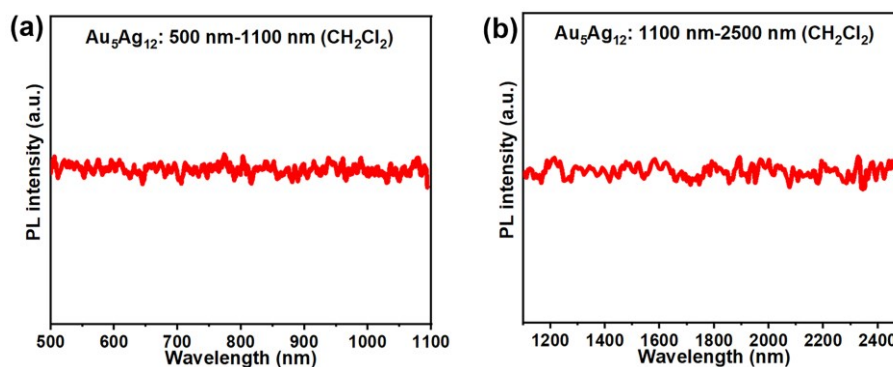

**Figure S14.** Photoluminescence spectra of  $\text{Au}_5\text{Ag}_{12}$  nanocluster in the  $\text{CH}_2\text{Cl}_2$  solution at 300 K. (a) in 500-1100 nm range; (b) in 1100-2500 nm range.

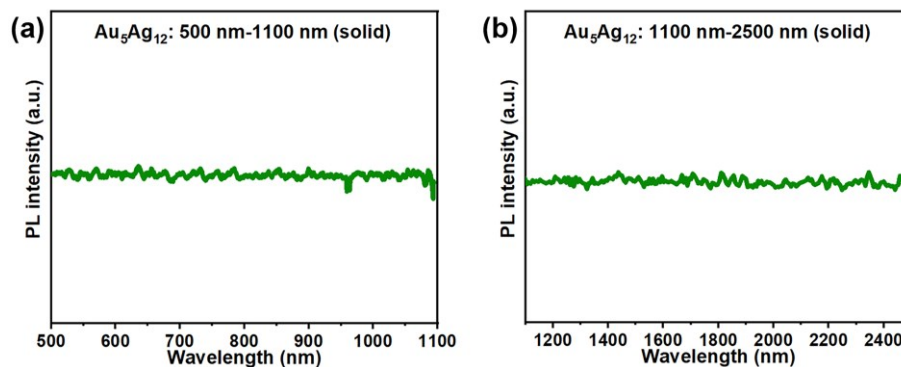

**Figure S15.** Photoluminescence spectra of  $\text{Au}_5\text{Ag}_{12}$  nanocluster in the solid state at 300 K. (a) in 500-1100 nm range; (b) in 1100-2500 nm range.

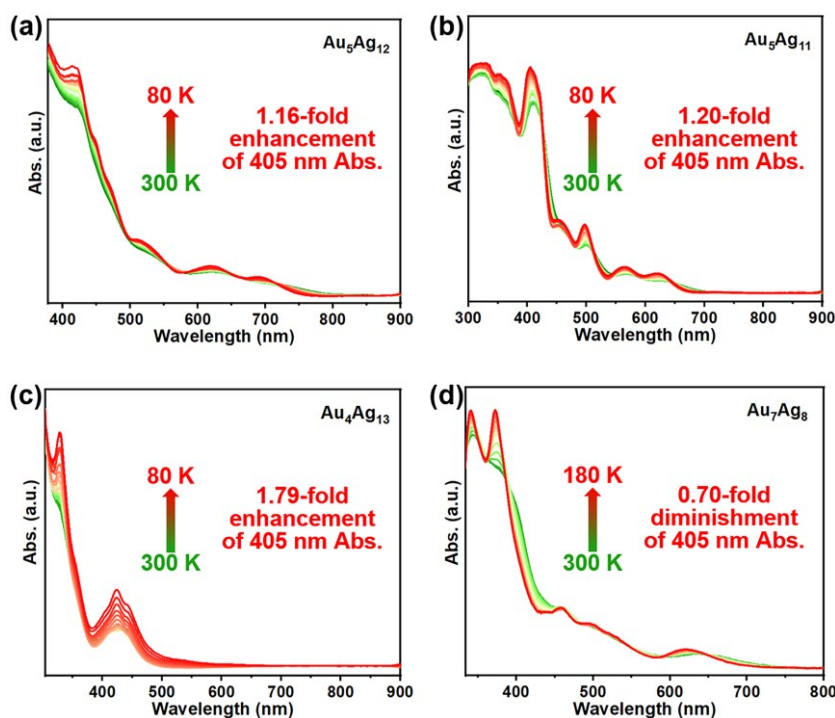

**Figure S16.** Temperature-dependent PL and UV-vis absorption spectra of  $\text{Au}_5\text{Ag}_{12}$ ,  $\text{Au}_5\text{Ag}_{11}$  and  $\text{Au}_4\text{Ag}_{13}$  nanoclusters in 2-MeTHF, and temperature-dependent PL and UV-vis absorption spectra of  $\text{Au}_7\text{Ag}_8$  nanocluster in acetone (from 300 K to 80 K, monitored per 10 K,  $\lambda_{\text{ex}} = 405$  nm). (a)  $\text{Au}_5\text{Ag}_{12}$ ; (b)  $\text{Au}_5\text{Ag}_{11}$ ; (c)  $\text{Au}_4\text{Ag}_{13}$ ; (d)  $\text{Au}_7\text{Ag}_8$ .



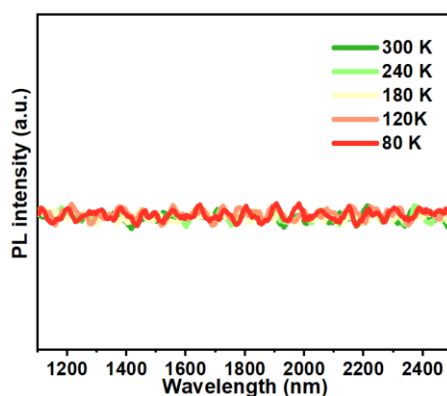

**Figure S17.** Temperature-dependent PL spectra of  $\text{Au}_5\text{Ag}_{12}$  nanocluster from 1100 nm to 2500 nm in 2-MeTHF from 300 K to 80 K ( $\lambda_{\text{ex}} = 405$  nm).

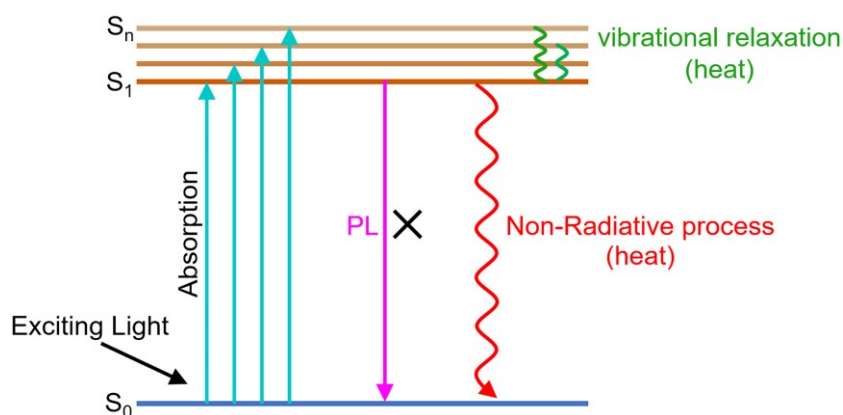

**Figure S18.** Simplified Jablonski diagram illustrating photophysical processes of  $\text{Au}_5\text{Ag}_{12}$  nanocluster. PL: photoluminescence.

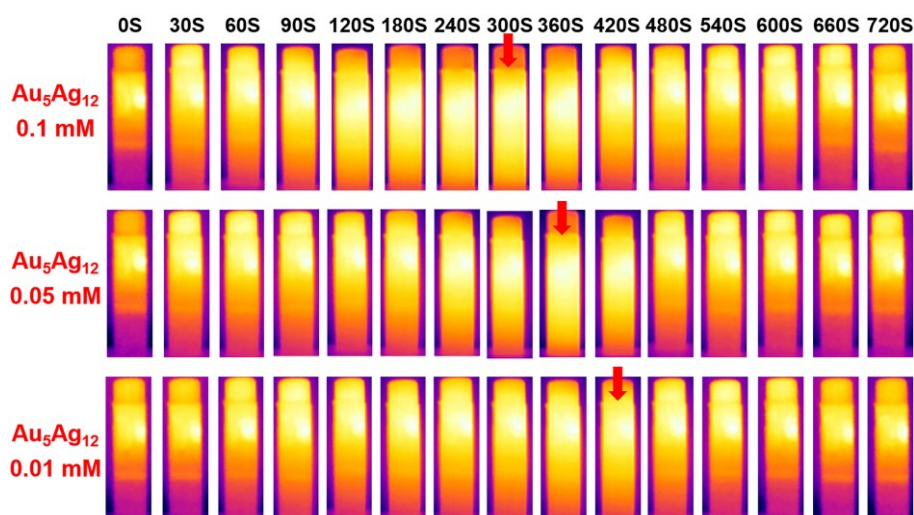

**Figure S19.** Time dependent images of  $\text{Au}_5\text{Ag}_{12}$  solutions of different concentrations (0.1 mM, 0.05 mM, and 0.01 mM) upon laser irradiation, followed by a cooling period (arrows indicate the time to stop irradiation).

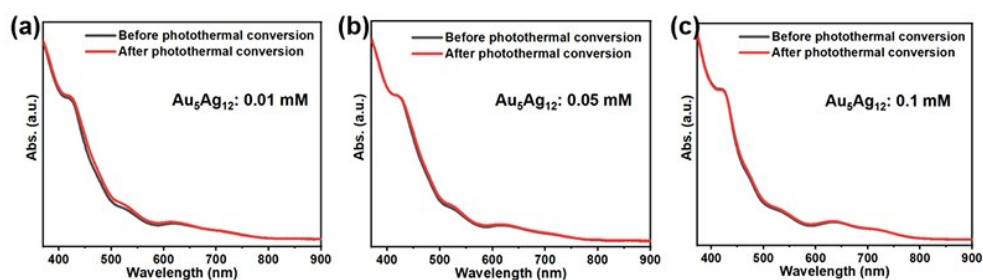

**Figure S20.** The photothermal stability of  $\text{Au}_5\text{Ag}_{12}$  nanoclusters at different concentrations was monitored by UV-vis spectroscopy. (a) 0.01 mM; (b) 0.05 mM; (c) 0.1 mM.

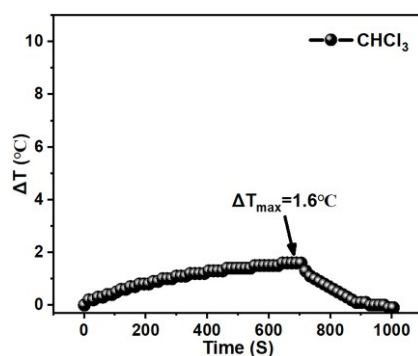

**Figure S21.** Temperature change of blank  $\text{CHCl}_3$  solvent. Laser irradiation: 808 nm,  $1.4 \text{ W cm}^{-2}$ .

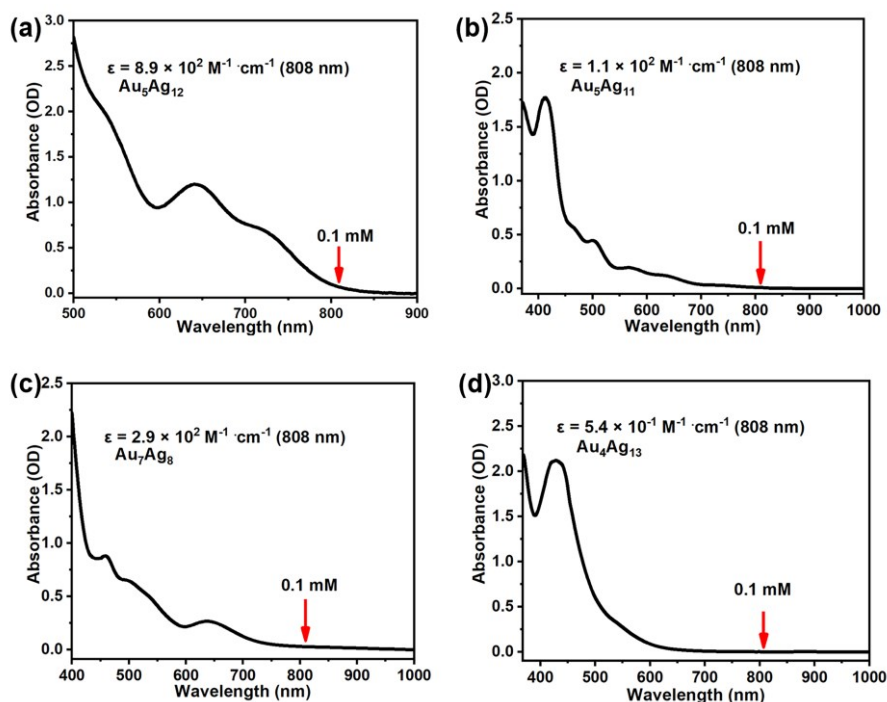

**Figure S22.** Absorption spectra of (a)  $\text{Au}_5\text{Ag}_{12}$ ; (b)  $\text{Au}_5\text{Ag}_{11}$ ; (c)  $\text{Au}_7\text{Ag}_8$  and (d)  $\text{Au}_4\text{Ag}_{13}$  dissolved in  $\text{CHCl}_3$ . Molar absorption coefficient  $\epsilon$  is calculated by Beer's law:  $A = \epsilon \cdot c \cdot l$  ( $A$  is absorbance,  $c$  is the concentration of the solution (0.1 M), and  $l$  is the light length, i.e., 1 cm).

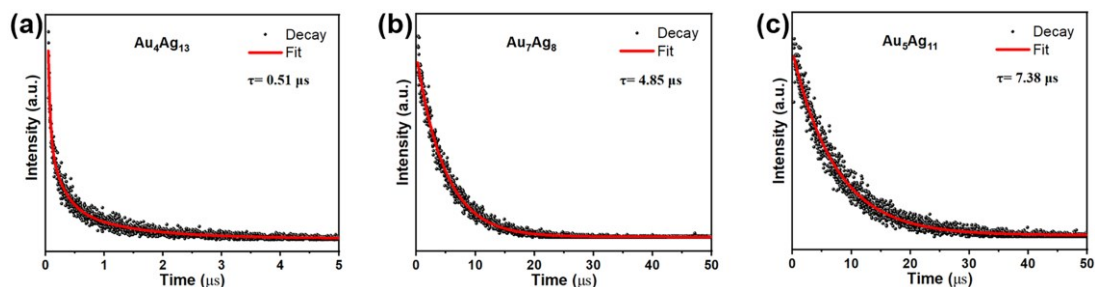

**Figure S23.** Fluorescence decay profile of  $\text{Au}_4\text{Ag}_{13}$ ,  $\text{Au}_7\text{Ag}_8$  and  $\text{Au}_5\text{Ag}_{11}$  nanoclusters. (a)  $\text{Au}_4\text{Ag}_{13}$ ; (b)  $\text{Au}_7\text{Ag}_8$ ; (c)  $\text{Au}_5\text{Ag}_{11}$ .

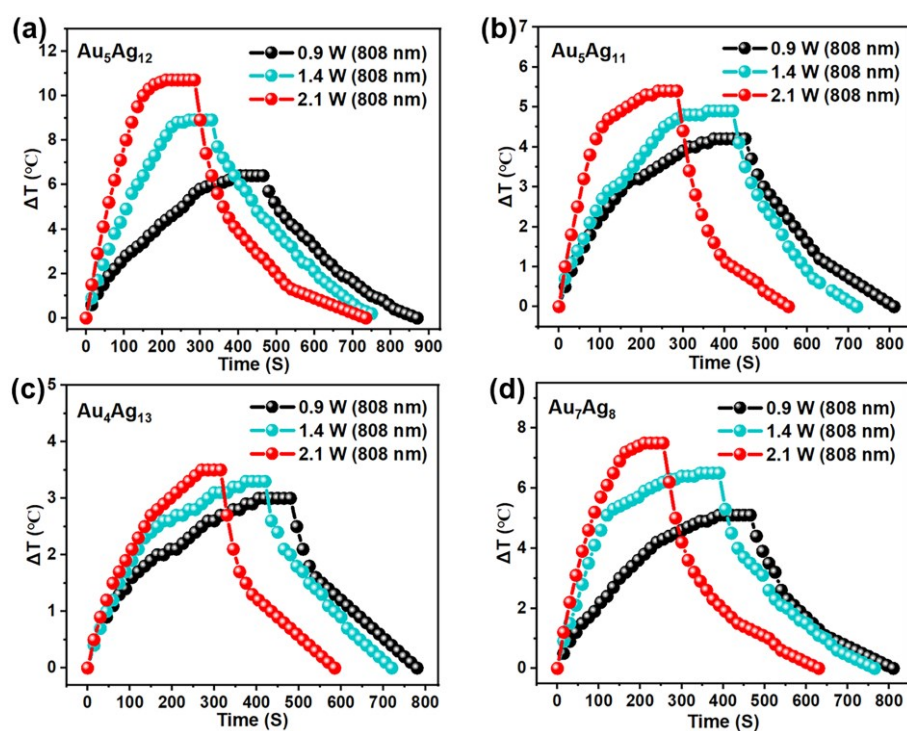

**Figure S24.** The time-dependent temperature of the four AuAg alloy nanoclusters solutions (0.1 mM) during laser irradiation at 808 nm with different power (0.9, 1.4, and 2.1  $\text{W cm}^{-2}$ ). (a)  $\text{Au}_5\text{Ag}_{12}$ ; (b)  $\text{Au}_5\text{Ag}_{11}$ ; (c)  $\text{Au}_4\text{Ag}_{13}$ ; (d)  $\text{Au}_7\text{Ag}_8$ . Solvent:  $\text{CHCl}_3$ .

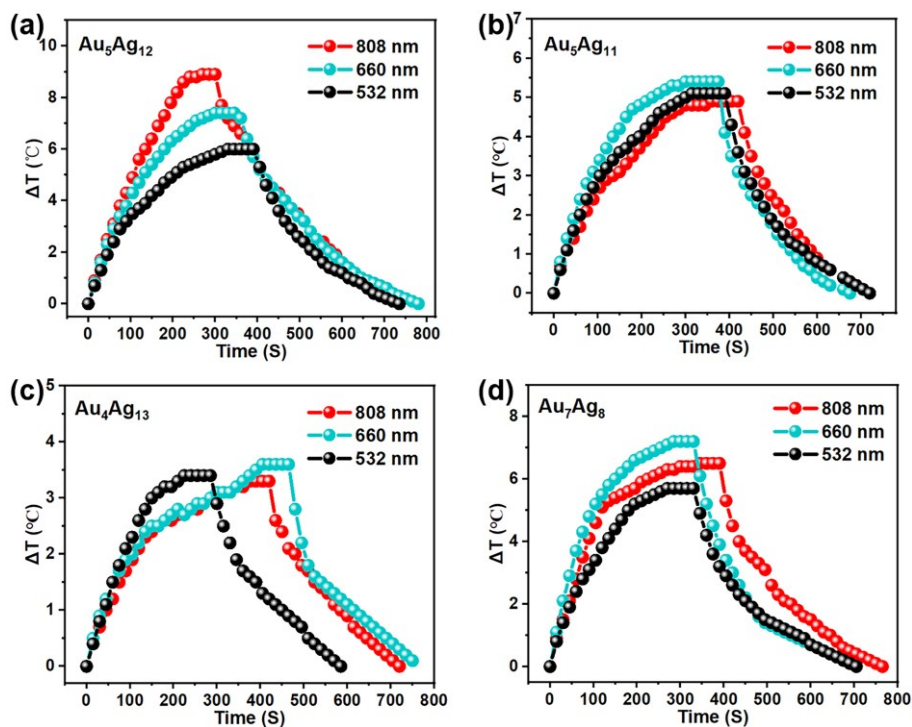

**Figure S25.** The time-dependent temperature of the four AuAg alloy nanoclusters solutions (0.1 mM) during laser irradiation at  $1.4 \text{ W cm}^{-2}$  with different wavelengths (808, 660, and 532 nm). (a)  $\text{Au}_5\text{Ag}_{12}$ ; (b)  $\text{Au}_5\text{Ag}_{11}$ ; (c)  $\text{Au}_4\text{Ag}_{13}$ ; (d)  $\text{Au}_7\text{Ag}_8$ . Solvent:  $\text{CHCl}_3$ .

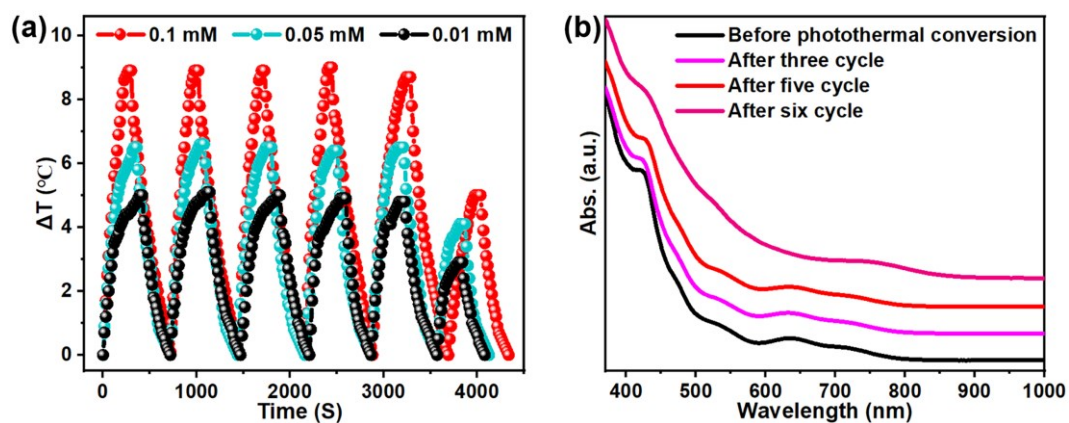

**Figure S26.** (a) Photothermal cycling measurement of  $\text{Au}_5\text{Ag}_{12}$  solutions (0.1 mM, red; 0.05 mM, cyan; 0.01 mM, black); (b) Corresponding UV-vis spectra of  $\text{Au}_5\text{Ag}_{12}$  (0.1 mM) after three cycles. Solvent:  $\text{CHCl}_3$ . Laser irradiation: 808 nm,  $1.4 \text{ W cm}^{-2}$ .

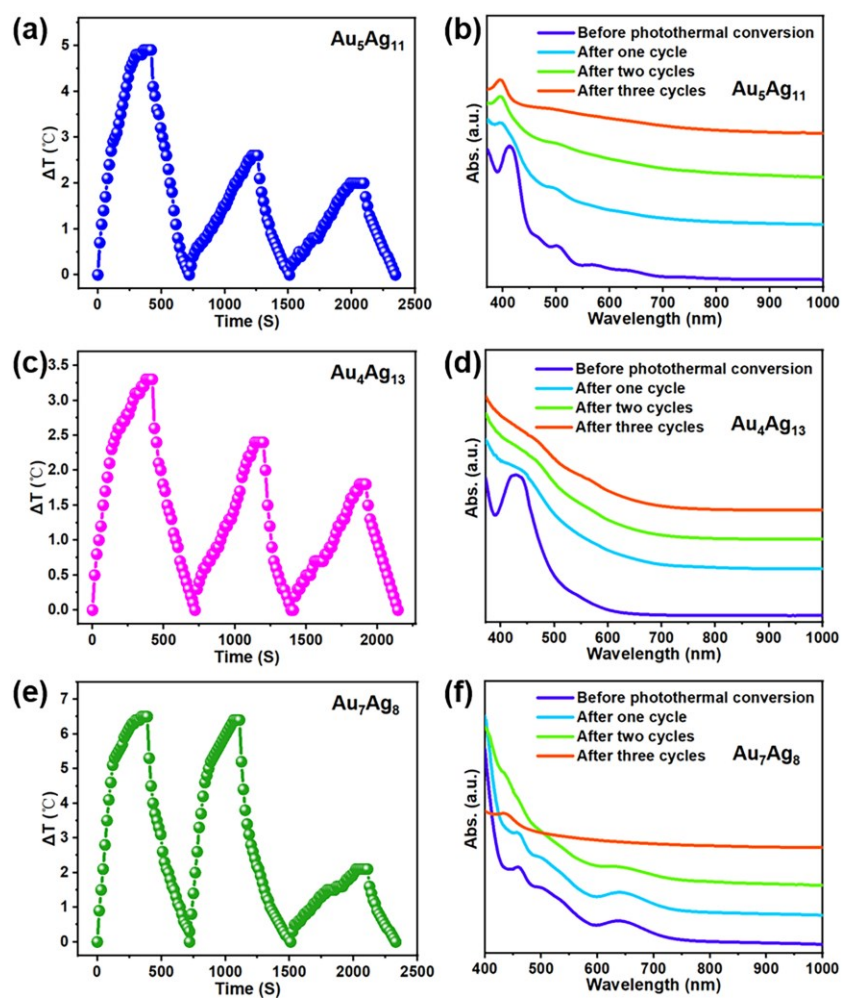

**Figure S27.** Photothermal cycling measurement and corresponding UV-vis spectra of  $\text{Au}_5\text{Ag}_{11}$ ,  $\text{Au}_4\text{Ag}_{13}$  and  $\text{Au}_7\text{Ag}_8$  nanoclusters in  $\text{CHCl}_3$ . (a) and (b)  $\text{Au}_5\text{Ag}_{11}$ ; (c) and (d)  $\text{Au}_4\text{Ag}_{13}$ ; (e) and (f)  $\text{Au}_7\text{Ag}_8$ .

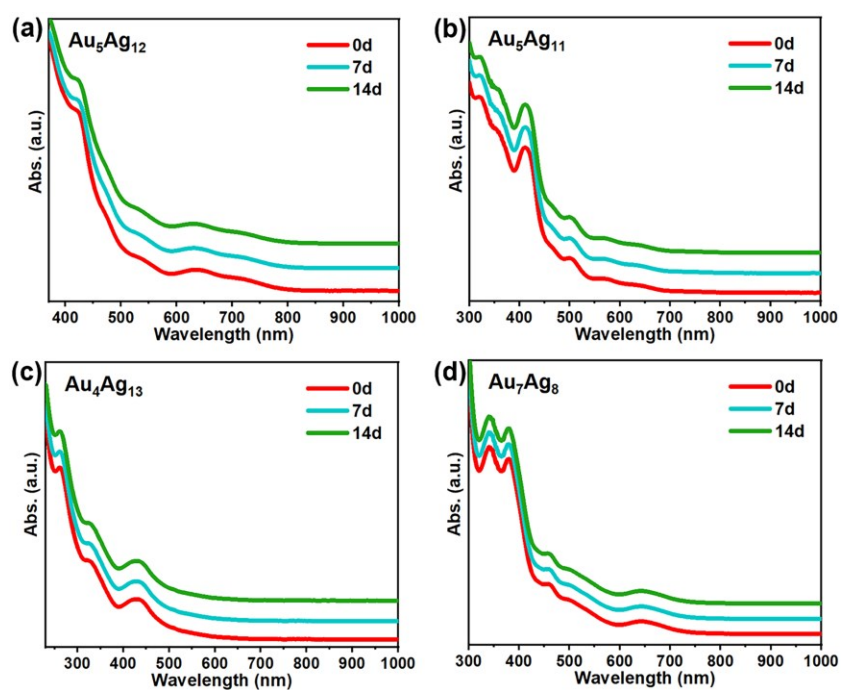

**Figure S28.** Monitoring the stability of  $\text{Au}_5\text{Ag}_{12}$ ,  $\text{Au}_5\text{Ag}_{11}$ ,  $\text{Au}_4\text{Ag}_{13}$  and  $\text{Au}_7\text{Ag}_8$  nanoclusters in  $\text{CHCl}_3$  within 14 days. (a)  $\text{Au}_5\text{Ag}_{12}$ ; (b)  $\text{Au}_5\text{Ag}_{11}$ ; (c)  $\text{Au}_4\text{Ag}_{13}$ ; (d)  $\text{Au}_7\text{Ag}_8$ .

## Section 2. Supporting Table

**Table S1.** The crystal structure parameters for **Au<sub>5</sub>Ag<sub>12</sub>(SR)<sub>9</sub>(dppf)<sub>4</sub>**.

|                                             |                                                                                                                                  |
|---------------------------------------------|----------------------------------------------------------------------------------------------------------------------------------|
| Empirical formula                           | C <sub>208</sub> H <sub>139</sub> Ag <sub>12</sub> Au <sub>5</sub> F <sub>54</sub> Fe <sub>4</sub> P <sub>8</sub> S <sub>9</sub> |
| Formula weight                              | 6703.16                                                                                                                          |
| Temperature/K                               | 150(2)                                                                                                                           |
| Crystal system                              | triclinic                                                                                                                        |
| Space group                                 | $P\bar{1}$                                                                                                                       |
| a/Å                                         | 21.5917(4)                                                                                                                       |
| b/Å                                         | 23.5980(5)                                                                                                                       |
| c/Å                                         | 26.7319(5)                                                                                                                       |
| $\alpha$ /°                                 | 95.805(2)                                                                                                                        |
| $\beta$ /°                                  | 110.205(2)                                                                                                                       |
| $\gamma$ /°                                 | 97.054(2)                                                                                                                        |
| Volume/Å <sup>3</sup>                       | 12533.9(5)                                                                                                                       |
| Z                                           | 2                                                                                                                                |
| $\rho_{\text{calc}}/\text{cm}^3$            | 1.776                                                                                                                            |
| $\mu/\text{mm}^{-1}$                        | 4.259                                                                                                                            |
| F(000)                                      | 6400.0                                                                                                                           |
| Radiation                                   | Mo K $\alpha$ ( $\lambda = 0.71073$ )                                                                                            |
| 2 $\theta$ range for data collection/°      | 3.806 to 61.744                                                                                                                  |
| Index ranges                                | -24 $\leq$ h $\leq$ 28, -29 $\leq$ k $\leq$ 33, -32 $\leq$ l $\leq$ 38                                                           |
| Reflections collected                       | 141631                                                                                                                           |
| Independent reflections                     | 60287 [ $R_{\text{int}} = 0.0664$ , $R_{\text{sigma}} = 0.0999$ ]                                                                |
| Data/restraints/parameters                  | 60287/3346/2701                                                                                                                  |
| Goodness-of-fit on F <sup>2</sup>           | 1.093                                                                                                                            |
| Final R indexes [ $I \geq 2\sigma(I)$ ]     | $R_1 = 0.0736$ , $wR_2 = 0.1863$                                                                                                 |
| Final R indexes [all data]                  | $R_1 = 0.1116$ , $wR_2 = 0.2037$                                                                                                 |
| Largest diff. peak/hole / e Å <sup>-3</sup> | 5.64/-3.93                                                                                                                       |

**Table S2.** The corresponding photoluminescence quantum yields (PLQY), fluorescence lifetimes ( $\tau$ ), radiative rate constants ( $k_R$ ) and non-radiative rate constants ( $k_{NR}$ ) of **Au<sub>4</sub>Ag<sub>13</sub>**, **Au<sub>7</sub>Ag<sub>8</sub>**, and **Au<sub>5</sub>Ag<sub>11</sub>** nanoclusters.

| Nanocluster                          | QY (%) | $\tau$ ( $\mu$ s) | $k_R$ ( $s^{-1}$ ) | $k_{NR}$ ( $s^{-1}$ ) |
|--------------------------------------|--------|-------------------|--------------------|-----------------------|
| <b>Au<sub>4</sub>Ag<sub>13</sub></b> | 0.19   | 0.51              | $3.73 \times 10^3$ | $1.96 \times 10^6$    |
| <b>Au<sub>7</sub>Ag<sub>8</sub></b>  | 1.62   | 4.85              | $3.34 \times 10^3$ | $2.02 \times 10^5$    |
| <b>Au<sub>5</sub>Ag<sub>11</sub></b> | 11.98  | 7.38              | $1.62 \times 10^4$ | $1.19 \times 10^5$    |
